# Supplementary material
Source: HighWire-hosted journal article supplement (https://bmjophth.bmj.com/content/8/1/e001215)
Supplement: inline-supplementary-material-3 [file inline-supplementary-material-3.pdf]

**Supplemental file 3: The FASD Eye Code 2.0**

|                     | <b>FASD Eye Code Protocol</b>                                                                                                              |                              |
|---------------------|--------------------------------------------------------------------------------------------------------------------------------------------|------------------------------|
| <b>Patient name</b> |                                                                                                                                            | <b>Patient maximum score</b> |
| <b>Code score</b>   | <b>A. Best corrected visual acuity (BCVA)</b>                                                                                              | <b>.../4</b>                 |
| 1                   | BCVA worst eye logMAR $\leq 0.1$ (decimal $\geq 0.8$ )                                                                                     |                              |
| 2                   | BCVA worst eye logMAR $> 0.1$ (decimal $< 0.8$ ) and best eye logMAR $< 0.3$ (decimal $> 0.5$ )                                            |                              |
| 3                   | BCVA each eye/best eye logMAR $\leq 0.5$ and $\geq 0.3$ (decimal $\geq 0.3$ and $\leq 0.5$ )                                               |                              |
| 4                   | BCVA best eye logMAR $> 0.5$ (decimal $< 0.3$ )                                                                                            |                              |
|                     | <b>B. Refraction in cycloplegia</b>                                                                                                        | <b>.../4</b>                 |
| 1                   | No significant refractive error                                                                                                            |                              |
| 2                   | Hyperopia ( $\geq 2.0$ D SE) or myopia ( $\geq 1.0$ D SE) in one or both eyes                                                              |                              |
| 3                   | Anisometropia ( $\geq 1.0$ D SE)                                                                                                           |                              |
| 4                   | Astigmatism ( $> 1.0$ D) in one or both eyes                                                                                               |                              |
|                     | <b>C. Strabismus and binocular function</b>                                                                                                | <b>.../4</b>                 |
| 1                   | Orthophoria and normal stereo acuity (TNO $\leq 60''$ ; Lang =200'')                                                                       |                              |
| 2                   | Heterophoria or intermittent heterotropia and normal stereo acuity (TNO $\leq 60''$ ; Lang =200'')                                         |                              |
| 3                   | No apparent deviation, or heterophoria, or intermittent heterotropia and subnormal stereo acuity (TNO $> 60''$ ; Lang $> 200''$ )          |                              |
| 4                   | Heterotropia and subnormal stereo acuity (TNO $> 60''$ ; Lang $> 200''$ ) or no stereo acuity (TNO neg; Lang neg)                          |                              |
|                     | <b>D. Ocular structural abnormalities</b>                                                                                                  | <b>.../4</b>                 |
| 1                   | No ocular structural abnormalities                                                                                                         |                              |
| 2                   | Ptosis and/or epicanthic folds in one or both eyes                                                                                         |                              |
| 3                   | Ocular abnormalities of the retinal vessels (i.e. increased tortuosity) and/or disc (excluding optic nerve hypoplasia) in one or both eyes |                              |
| 4                   | Optic nerve hypoplasia (ONH) in one or both eyes                                                                                           |                              |
|                     | <b>Total score (A+B+C+D)</b><br>(A cut-off total score of $\geq 8$ showed 52% sensitivity and 95% specificity)                             | <b>.../16</b>                |
